1 **INGEsT: An Open-Source Behavioral Setup for Studying Self-motivated Ingestive**  
2 **Behavior and Learned Operant Behavior**

3  
4 Zhe Zhao<sup>1,3</sup>, Binbin Xu<sup>2,3</sup>, Cody L. Loomis<sup>1</sup>, Skylar A. Anthony<sup>1</sup>, Isaac McKie<sup>1</sup>,  
5 Abhishikta Srigiriraju<sup>1</sup>, McLean Bolton<sup>1</sup>, Sarah A. Stern<sup>1\*</sup>

6  
7 <sup>1</sup> Max Planck Florida Institute for Neuroscience, 1 Max Planck Way, Jupiter, FL 33458,  
8 USA

9 <sup>2</sup> EuroMov Digital Health in Motion, Univ Montpellier, IMT Mines Alès, the, 6 Av. de  
10 Clavières, 30100 Alès, France

11 <sup>3</sup> These authors contributed equally

12

13 \* Correspondence:

14 sarah.stern@mpfi.org (S. A. S.)

15

16 **Abstract:**

17 Ingestive behavior is driven by negative internal hunger and thirst states, as well  
18 as by positive expected rewards. Although the neural substrates underlying feeding and  
19 drinking behaviors have been widely investigated, they have primarily been studied in  
20 isolation, even though eating can also trigger thirst, and vice versa. Thus, it is still unclear  
21 how the brain encodes body states, recalls the memory of food and water reward  
22 outcomes, generates feeding/drinking motivation, and triggers ingestive behavior. Here,  
23 we developed an INstrument for Gauging Eating and Thirst (INGEsT), a custom-made  
24 behavioral chamber which allows for precise measurement of both feeding and drinking  
25 by combining a FED3 food dispenser, lickometers for dispensing liquid, a camera for  
26 behavioral tracking, LED light for optogenetics, and calcium imaging miniscope. In  
27 addition, *in vivo* calcium imaging, optogenetics, and video recordings are well  
28 synchronized with animal behaviors, e.g., nose pokes, pellet retrieval, and water licking,  
29 by using a Bpod microprocessor and timestamping behavioral and imaging data. The  
30 INGEsT behavioral chamber enables many types of experiments, including free  
31 feeding/drinking, operant behavior to obtain food or water, and food/water choice  
32 behavior. Here, we tracked activity of insular cortex and mPFC Htr3a neurons using  
33 miniscopes and demonstrate that these neurons encode many aspects of ingestive  
34 behavior during operant learning and food/water choice and that their activity can be  
35 tuned by internal state. Overall, we have built a platform, consisting of both hardware and  
36 software, to precisely monitor innate ingestive, and learned operant, behaviors and to  
37 investigate the neural correlates of self-motivated and learned feeding/drinking behaviors.

38

39

40

41

42

43

44

45

46

47 **Introduction:**

48 Ingestive behavior is critical to maintain the body's energy and fluid levels and is  
49 necessary for survival. Hunger and thirst, respectively, induce feeding and drinking  
50 behaviors by negative reinforcement (Allen et al., 2017; Betley et al., 2015), whereas the  
51 rewarding effects of food and drink promote ingestive behavior through positive  
52 reinforcement (Stern et al., 2020). In addition, memory also impacts food and water  
53 consumption based on previous experience of behavioral consequences (Stern et al.,  
54 2021; Stern *et al.*, 2020). However, it is mostly unknown how the brain encodes food and  
55 water deprivation compared to memories related to feeding and drinking, and how this  
56 generates motivation for ingestion. Specifically, it is unclear whether different neural  
57 dynamics underlie 1) food- and water-deprivation states, 2) motivation to seek food and  
58 water, and 3) food and water rewards. Understanding these mechanisms underlying  
59 ingestive behavior will better help to develop approaches to treat obesity and eating  
60 disorders, e.g., anorexia nervosa and bulimia nervosa.

61  
62 The brain senses body energy and fluid states by peripheral hormones and the  
63 nervous system (Gizowski and Bourque, 2018; Leib et al., 2016; Rowland, 2004; Watts  
64 et al., 2022). The hypothalamus and hindbrain are key brain regions that receive hormonal  
65 signals as well as information arriving from vagus nerve. Subsequently, internal body  
66 state information reaches cortical regions through the thalamus. The insular cortex (or  
67 insula) and medial prefrontal cortex (mPFC) are reported as key interoceptive brain areas  
68 to sense internal body states and generate proper behaviors (Craig, 2003; Livneh and  
69 Andermann, 2021; Zhao et al., 2022; Zhao et al., 2020). *In vivo* imaging in the insula and  
70 electrophysiological recording in the mPFC showed specific feeding-response and  
71 drinking-response neurons (Eiselt et al., 2021; Livneh et al., 2017; Livneh et al., 2020).  
72 Furthermore, insular neurons also represent body food- and water-deprivation states  
73 (Livneh *et al.*, 2017; Livneh *et al.*, 2020). However, in these studies, mice under food- or  
74 water-restricted states are tested on different days with only food or only water. Thus, the  
75 neural dynamics of state transitions (e.g., hunger to thirst after eating food and thirst to  
76 hunger after drinking water), are unknown. One recent study developed a food/water  
77 choice behavioral task, in which food- or water-deprived head-restrained mice chose food  
78 and water on the left or right side after an odor stimulus (Richman et al., 2023).  
79 Electrophysiological recording in multiple brain regions including prefrontal and motor  
80 cortices, forebrain, and midbrain simultaneously reveals that different neurons correlate  
81 with specific phases of the trial. Some neurons displayed persistent activity throughout  
82 trials, but the activity patterns were different in the food/water trials, suggesting that these  
83 neurons represent the internal need state of the body (Richman *et al.*, 2023). However,  
84 this study has several caveats: first, it used liquid food with additional sodium to motivate  
85 drinking rather than standard chow. Secondly, food/water on the right or left side cannot  
86 exclude the potential effect of direction factor on the neural activity. Last, the choice is  
87 triggered by an external cue instead of self-paced motivated behavior.

88  
89 To overcome some of these shortcomings, we report here a novel setup,  
90 INstrument for Gauging Eating and Thirst (INGeT), a custom-made feeding/drinking  
91 behavioral box to investigate the above questions. Using this chamber, we can observe  
92 feeding and drinking behavior simultaneously in combination with *in vivo* calcium imaging,

93 which will allow for more naturalistic behavior, from both the standpoint of intermingling  
94 need states, as well as allowing for freely moving behavior. In addition to describing the  
95 hardware, we also establish a platform for animal behavior and imaging data analysis.

96

## 97 **Results:**

98

### 99 **INGEsT behavioral chamber and affiliated setups**

100 To study feeding and drinking behavior in the same context, we developed a behavioral  
101 chamber, consisting of a pellet dispenser (FED3) and a two-port lickometer, to precisely  
102 record time points of pellet retrieval and licking water (**Figure 1A**). We called this chamber  
103 INstrument for Gauging Eating and Thirst (INGEsT). The affiliated setups include Inscopix  
104 miniscope, a voltage pulse generator (Pulse Pal), and two cameras (**Figure 1B**). FED3 is  
105 an open-source device that is widely used to measure food intake hourly or daily for free-  
106 feeding studies (Matikainen-Ankney et al., 2021). In addition, it has two nose poke ports  
107 for progressive ratio and similar operant tasks to study motivation and learning. The  
108 lickometers can detect the signal of licking. The nose poke, pellet retrieval, and lick signals  
109 are recorded by a microprocessor, Bpod (**Figures 1A and C**), which can also send out  
110 TTL signals to trigger in vivo calcium imaging, LED light for optogenetic perturbation, and  
111 video recordings of animal behavior. Calcium imaging data is synchronized with  
112 behavioral data by timestamps. Pulse Pal can be triggered to start stimulation with the  
113 protocol (specific frequency and duration of stimulation) set in the device (**Figure 1B and**  
114 **C**). We show photos of the mouse working area, FED3 and lickometer in the INGEsT, and  
115 Pulse Pal, Bpod, imaging acquisition box, etc. outside of the INGEsT (**Figures 1D-F**).

116

### 117 **Free feeding/drinking behavior and video recording**

118 To validate that the setup can precisely record pellet retrieval and licking signals, we first  
119 measured feeding and drinking behaviors under food restriction (**Figure 2A**).  
120 Interestingly, on the first day, mice explored the new environment, and showed licking  
121 water spout before getting pellets even though they were food deprived (**Figures 2B-D**),  
122 suggesting that mice need to learn where to obtain food and water before they can  
123 appropriately satisfy their need states. After this first day, when mice were familiar with  
124 the behavioral chamber, food-deprived mice first ate pellets and then began to drink  
125 water only at the end of the training session. We found that mice tend to switch between  
126 feeding and drinking behaviors after 3 sessions of training (**Figures 2B and C**), about 10  
127 to 20 minutes after starting the experiment (**Figure 2D**). Additionally, we recorded the  
128 animal behavior with a camera on the top of the INGEsT chamber (**Figures 2E-G**).  
129 Throughout the entire session, mice with miniscopes stayed primarily in the food and  
130 water area, whereas they spent little time in the center of the box (**Figures 2F-G**). We  
131 also analyzed the locomotion of mice without implants from the first day in the chamber.  
132 The mice increased the time in the food and water area after several days of experiments  
133 (**Figures 2H and I**). Thus, although the addition of miniscopes may lead to decreased  
134 movement in the chamber, animals are still able and willing to perform goal-directed  
135 behaviors, and will prioritize remaining in that zone.

136

### 137 **INGEsT facilitates imaging of neural activity during freely moving reversal learning** 138 **task associated with chow pellets or water**

139 To verify the synchronization of animal behavior with imaging data, we examined nose-  
140 poke associated pellet delivery in combination with in vivo calcium imaging with the  
141 Inscopix miniscope. We expressed a calcium indicator, GCaMP8m, in the insular cortex  
142 by using a viral approach (pGP-AAV-syn-jGCaMP8m). Immediately following the viral  
143 injection, we implanted a GRIN lens 50  $\mu\text{m}$  above the injection site (**Figure 3A**). 6 weeks  
144 later after the surgery, we tested the calcium signal and started nose-poke associated  
145 pellet training (**Figures 3B and C**). This nose-poke training lasted for 30 minutes per day.  
146 The mice learned to make nose pokes for food on the first day of training and were able  
147 to perform at least 15 trials in 30 minutes on the following days, at which point we  
148 considered them to have learned the behavior. To avoid habitual nose-poke behavior, we  
149 use a reversal operant behavioral task in which mice can obtain a pellet after an active  
150 nose poke on one side of the ports and can have 5 active nose pokes on the same side  
151 of the nose-poke port. After 5 active nose pokes, the nose-poke port becomes inactive  
152 and the other port switches to active from inactive (**Figure 3D**). This reversal learning  
153 training lasted for 30 minutes per day. After several days of training, mice increased the  
154 correct rate and trial number of reversals (**Figure 3E**).

155  
156 In order to analyze the cell activity during different behaviors, e.g., nose poke, pellet  
157 retrieval, and pellet consumption, each active nose poke was set to make the nose-poke  
158 port inactive for the next 10 seconds (**Figure 3F**). We imaged 68 cells in the insular cortex  
159 during reversal learning training (**Figure 3G**), and we show 5 traces of neural activity from  
160 5 representative cells during animal behavior (**Figure 3H**). The black and magenta lines  
161 on the trace indicate active nose pokes and pellet retrievals, respectively. The dashed  
162 lines indicate inactive nose pokes. In addition, the green and cyan squares indicate nose  
163 poke on the left side and right side of the nose-poke ports, respectively. Traces 1 and 5  
164 show examples of neurons that increased activity before nose pokes, whereas traces 2  
165 and 4 showed peak activity before pellet retrieval, and trace 3 showed an increase in  
166 activity after pellet retrieval (**Figure 3H**), suggesting different neurons encode different  
167 periods of the behavior. In other words, cells that are tuned to nose-poke, pellet retrieval,  
168 and pellet consumption after the retrieval are all present in the insular cortex.  
169 Furthermore, the behavioral data showed that the mouse made several inactive nose  
170 pokes before switching to the active nose-poke port (**Figure 3H**), which avoided habitual  
171 nose-poke behavior and also presented a reversal paradigm to investigate behavioral  
172 flexibility. To observe the neural response during specific periods of behavior, we  
173 analyzed neural activity 2 seconds before and 10 seconds after active/inactive nose  
174 pokes and pellet retrieval, and we show two examples of neural responses here (**Figures**  
175 **3I-L**). Overall, the mouse performed 30 right and 32 left active nose pokes. However, it  
176 performed 21 right and 88 left inactive nose pokes, suggesting that the mouse exhibited  
177 a preference for left nose pokes. Accordingly, one neuron showed a peak of activity before  
178 pellet retrieval (**Figures 3I and J**), but the response was stronger in left nose-poke trials  
179 than in right nose-poke trials (**Figure 3J**). The arrows indicate the time points around the  
180 active nose pokes since the mouse can continue to do nose pokes (**Figure 3I**). Another  
181 cell showed a strong response during pellet consumption (**Figures 3K and L**). In this  
182 case, both left and right nose-poke trials showed a strong response during pellet  
183 consumption (**Figure 3L**). The arrows indicate the time points around the active nose  
184 pokes (**Figure 3K**) that are not themselves time-locked to inactive poking. To observe

185 the different populations of neurons' responses during the pellet associated nose-poke  
186 behavior, we made a heatmap of all cells with the same types of trials, e.g., left or right  
187 nose poke followed by pellet retrieval (**Figure 3M**). The results showed that different  
188 populations of neurons showed peak activity at different periods of the behavior. There  
189 were 14.71 percent of cells responding to nose pokes, 23.53 percent and 26.47 percent  
190 of cells responded to pellet retrievals and pellet consumption respectively; and 35.29  
191 percent of cells were not tuned by the behavior (**Figure 3N**).

192  
193 INGEsT may also be used to study how the brain encodes operant drinking behavior. To  
194 demonstrate this, we next examined nose-poke associated water delivery in combination  
195 with freely moving *in vivo* calcium imaging (**Figure 4A**). Similarly to food-associated  
196 training, this nose-poke associated water training lasted for 30 minutes per day (**Figure**  
197 **4B**). Here, the mice learned to complete nose pokes for water and perform at least 15  
198 trials in a session on the first day of training, presumably because the mice have already  
199 completed the pellet-associated nose-poke behavior and are more familiar with the task  
200 and setup. Again, to avoid habitual nose-poke behavior, we use a reversal operant  
201 behavioral task which is similar to the pellet-associated reversal learning experiment.  
202 Mice obtain a drop of water if they lick the same side of the water spout with the nose-  
203 poke port after an active nose poke on one side of the port, and can have 5 active nose  
204 pokes on the same side of the nose-poke port. After 5 active nose pokes, the nose-poke  
205 port becomes inactive and the other port switches to active from inactive (**Figure 4C**).  
206 This reversal learning training lasted for 30 minutes per day. After several days of training,  
207 mice increased the correct rate and trial number of the reversals (**Figure 4D**).

208  
209 We then imaged the neural activity in the insular cortex during water reversal learning  
210 with the same parameters as for food (**Figure 4E**) in the same mouse as imaged in the  
211 food-associated reversal learning phase. Traces of 5 representative cells from 74 cells  
212 were shown with nose pokes and licks (**Figures 4F and G**). The black lines and magenta  
213 lines indicate active nose pokes and licks. The black dashed lines represent inactive nose  
214 pokes. In addition, the green and cyan squares indicate nose poke on left side and right  
215 side of nose-poke ports, respectively. Traces 1 and 3 showed neural responses after licks  
216 (or water rewards), whereas traces 2 and 4 showed peak activity at licks or water rewards.  
217 Trace 5 did not show a clear correlation with nose pokes and licks (**Figure 4G**),  
218 suggesting different neurons correlate with specific behaviors or behavioral outcomes. To  
219 observe neural responses in specific periods of the nose pokes followed by water reward,  
220 we aligned the imaging traces of calcium levels at nose pokes and licks (**Figures 4H and**  
221 **K**). This mouse performed 12 right and 15 left active nose pokes, but it performed 24 right  
222 and 75 left inactive nose pokes, again suggesting that this mouse exhibited a preference  
223 for the left nose poke port. Accordingly, one example neuron showed a peak of activity at  
224 the licking time (**Figures 4H and I**), but the response was stronger in left nose-poke trials  
225 than in the right nose-poke trials (**Figure 4I**). Another example neuron showed a strong  
226 response after water reward (**Figures 4J and K**). Both left and right nose-poke trials  
227 showed a strong response after licking water (**Figure 4K**). The peak of activity correlates  
228 with licking action since the licking lasts several seconds after the water reward. To  
229 observe activity of all imaged neurons in the same type of trials, we analyzed the calcium  
230 imaging traces of left and right active pokes. Most of imaged cells in the insular cortex

231 showed peak activity around nose pokes and some cells showed responses around licks.  
232 Specifically, there were 9.46 percent of cells in response to nose pokes, 18.92 percent  
233 and 13.51 percent of cells showed peak activity at or after licks or water reward.  
234 Interestingly, 5.4 percent of cells showed a decrease in activity after licks or water reward.  
235 Therefore, these data show that this setup can be used to perform food- and water-  
236 associated operant behavior with *in vivo* calcium imaging to investigate neural  
237 mechanisms of drinking motivation, water reward, and reversal learning. Moreover, they  
238 indicate that although mice will nose-poke at the inactive port, the activity of some neurons  
239 indicates that the insular cortex can distinguish between nose pokes that will lead to  
240 reward and those that do not.

### 241 242 **INGEsT facilitates imaging of neural activity during freely moving feeding and** 243 **drinking behavioral choice**

244 To investigate if the same neurons encode different choices and rewards, we developed  
245 a self-motivated food and water choice behavior using INGEsT. These mice have  
246 completed the food/water-associated reversal learning task before the choice task  
247 (**Figure 5A**). In this task, both nose-poke ports are active, and active nose poke triggers  
248 pellet delivery and water availability. Both nose poke ports became inactive for 6 seconds  
249 after an active nose poke. Mice can then choose to retrieve a pellet or lick for water. If the  
250 mice retrieves the pellet, water will not be available until the next nose poke, but  
251 unretrieved pellets can remain in the food well even if mice choose to lick for water. We  
252 first trained the mice following long-term water restriction (0.8 ml of water is available  
253 daily). Following two days of training, (**Figure 5B**) the water-restricted mouse showed  
254 many water choice trials, but few food choice trials or water and food choice (defined as  
255 when the mouse chooses water, then food within 6 seconds after the previous nose poke),  
256 despite the fact that each nose poke triggers an available pellet. After 3 days of choice  
257 behavior, mice were switched from water restriction to food restriction (**Figures 5C and**  
258 **D**). Under food restriction condition, this mouse showed many food choice trials, but few  
259 water choice trials and few water and food choice trials (**Figure 5C**). As previously, this  
260 mouse exhibited a strong leftward bias. Interestingly, while water restricted, there were  
261 very few food-choice trials, but while food-restricted, there was an increase in the number  
262 of water+food choices (**Figure 5D**). This may reflect the mouse's preference to wet the  
263 mouth for dry chow or to satisfy osmometric thirst as the mice eat more food.

264  
265 Concurrent with choice behavior, we imaged neural activity in the insular cortex. We can  
266 detect feeding under water-restricted conditions and vice versa (**Figures 5E and F**). In  
267 addition, we can compare the same cells imaged on different days. We showed activity  
268 traces of 3 cells under water restriction on the first day and under food restriction on the  
269 following day. Traces 1 of Figures 5 E and F are from the same cell as Figure 5G, and  
270 traces 2 of Figures 5 E and F are from the same cell as Figure 5H. We first compared  
271 the neural activity of the same cell in water choice trials and food choice trials, then  
272 compared the neural activity of the same cell under water restriction with food restriction  
273 (**Figures 5G and H**). One neuron showed a peak of activity after licking water but a weak  
274 response to pellet under water restriction conditions. During food restriction, this cell  
275 showed a peak of activity before licking water but no consistent response to pellet retrieval  
276 (**Figure 5G**), indicating this cell may represent specific water seeking behavior. Another

277 cell showed peak activity after both licking water and pellet retrieval. The response during  
278 licking was stronger than pellet consumption under water restriction condition, and the  
279 response during licking was weaker than pellet consumption under food restriction  
280 conditions (**Figure 5H**), indicating this cell may represent general motivation.  
281 Furthermore, we analyzed neural activity of each cell in the same type of trials and  
282 showed the activity of all cells on a heatmap. Most cells showed peak activity around  
283 pellet retrieval (26.85%), and these cells are much more than other types of cells, e.g.,  
284 nose poke responsive cells (16.67%), and lick-responsive cells (6.48%). (**Figures 5I-M**).  
285 The number of lick-responsive cells here (**Figure 5M**) are lower than during the imaging  
286 of water-restricted conditions (**Figure 4N**), indicating that the neural response is tuned by  
287 the internal body state.

### 288 289 **INGEsT facilitates imaging of neural activity in specific cell types during freely** 290 **moving feeding and drinking behavioral choice**

291 In the previous examples, we imaged from a general population of insular cortex neurons.  
292 To examine whether tuning of molecularly defined specific cell types can be detected in  
293 the choice task, we imaged one type of interneuron, 5-HT<sub>3A</sub> receptor-positive cells, in the  
294 medial prefrontal cortex (mPFC). We injected a viral vector carrying a Cre-dependent  
295 expression of GCaMP6s (pAAV.CAG.FLEX.GCaMP6s.WPRE.SV40) into the mPFC of a  
296 Htr3a-Cre: Ai-14 mouse, and the GRIN lens was implanted immediately after the virus  
297 injection (**Figure 6A**). This mouse completed the reversal nose-poke behavioral task with  
298 the same protocol as the previous experiments (**Figure 6B, and Figures 3-5**). We first  
299 performed feeding and drinking choice experiment for three continuous sessions under  
300 water restriction and then switched to food restriction (**Figure 6B**). Here, we showed the  
301 animal behavioral data on the third day of choice behavior under water restriction (**Figure**  
302 **6C**) and started food restriction on the following day (**Figure 6C**). We imaged 25 cells and  
303 23 cells on the day of water restriction and food restriction, respectively. 3 calcium imaging  
304 traces with nose-poke behavior and food/water rewards under water restriction are shown  
305 (**Figure 6E, top**), and 3 traces from the same cells are shown to compare neural  
306 responses to the same behavior under different water- and food-restricted conditions  
307 (**Figure 6E, bottom**). The magenta lines indicate nose pokes. The blue and cyan lines  
308 represent licks and pellet retrievals, respectively. The neuron of trace 1 showed the peak  
309 activity is before licks under water restriction (**Figures 6F and G**), but not there under  
310 food restriction (**Figures 6H and I**), suggesting that the neural activity depends on internal  
311 body states. The neuron of trace 2 showed a strong response in the period of post-pellet  
312 retrieval, but a weak response to licking water (**Figures 6J and K**), indicating this neural  
313 response may also depend on the internal body state. To reveal the overview of neural  
314 responses of all imaged cells in specific types of trials, we averaged the imaging traces  
315 of the same types of trials from each cell, then made heatmap and sorted the cells based  
316 on the time of maximum value of the trace. It shows most of imaged cells showed peak  
317 activity around pellet retrievals under food restriction conditions (**Figures 6L and M**).  
318 There were 30.43 percent of cells responded to pellet retrieval, and 8.7 percent of cells  
319 showed a response at post-pellet retrieval.

320  
321  
322

323 **DISCUSSION:**

324

325 This study reports a novel behavioral setup named INGEsT for investigating the neural  
326 dynamics underlying innate ingestive behavior as well as learned operant behaviors. Our  
327 data demonstrated that food restricted mice eat pellets at the beginning in the behavioral  
328 chamber, and switch between water drinking behavior and feeding behavior after around  
329 15 minutes, indicating physiological body state transition, driven by internal states. In  
330 addition, we developed a food or water associated operant behavior task to investigate  
331 neural mechanisms of motivation and reward. Furthermore, we developed a novel  
332 behavioral task, a self-paced food and water choice task to study neural dynamics  
333 underlying different motivations and rewards. Overall, this work develops a behavioral  
334 setup benefiting the systems neuroscience field and helping to investigate the neural  
335 mechanisms of internal body states, motivation, reward, and choice.

336

337 The main aim of developing the INGEsT chamber is to enable the study of self-motivated  
338 food/water choice behavior. This is the first published study combining a solid pellet  
339 dispenser with a lickometer, allowing us to investigate neural mechanisms of  
340 feeding/drinking motivation and food/water reward without any confounds of providing  
341 liquid nutrition. Furthermore, the INGEsT chamber can also be used to study very  
342 challenging questions, e.g., neural mechanisms of internal body states and memory  
343 related to feeding and drinking behaviors.

344

345 The INGEsT can precisely record the time point of pellet retrieval and licking water at a  
346 time resolution of a microsecond. In the free feeding and drinking behavioral task, a pellet  
347 is automatically delivered within a second after the previous pellet retrieval, and water is  
348 delivered one drop per second if licking is detected. The amount of water delivered can  
349 be adjusted by the open time of the valve. This behavior is therefore ideal for studying  
350 slow dynamics since each feeding or drinking bout can last for seconds to a minute.

351

352 The INGEsT chamber can also be used for self-paced operant behavior, e.g., pellet or  
353 water delivery following an active nose poke. We analyzed the neural activity at different  
354 phases of the nose poke and ingestive behavior, i.e., pre-nose poke, pre-pellet retrieval,  
355 pre-licking water, nose poke, pellet retrieval, licking water, etc. Here, neurons can be  
356 identified as potentially representative of motivation or reward, though additional studies,  
357 including activation or inhibition of neural populations would be needed to confirm those  
358 correlations. In addition, we also analyzed inactive nose pokes in which no reward is  
359 delivered, allowing us to examine whether the neurons only encode nose poke action or  
360 not. Our current work did not introduce an interval between nose poke and food/water  
361 delivery, which decreased the difficulty of the task. Therefore, in some trials, neural  
362 responses to nose pokes cannot be distinguished from a neural response to licking water.  
363 However, the chamber allows for flexible training parameters, and in the future, we will  
364 introduce a 1 second delay before pellet or water access after a nose poke, which will  
365 address the overlap issue. One caveat of this task is that if the mice retrieve the pellet,  
366 water will not be available until the next nose poke, but unretrieved pellets can remain in  
367 the food well even if mice choose to lick for water. This is because the limited



368 communication ports of the electronic board in the FED3, but in the future, we will improve  
369 the hardware to address this.

370

371 Reversal learning task is successfully performed in this study. Here, we reverse the active  
372 nose poke port, aiming to avoid habitual nose-poke behavior, and did not require mice to  
373 perform to a certain reversal criteria. However, the INGEst chamber can also be used to  
374 investigate reversal learning itself, in which case additional sessions would be needed to  
375 improve performance.

376

### 377 **Conclusion:**

378 This study successfully developed the INGEst to study neural mechanisms of feeding  
379 and drinking behavior in the same experiment. This is a fundamental contribution to the  
380 ingestive behavior field and will help researchers to better investigate the underlying  
381 mechanisms of basic questions and brain disorders.

382

383

### 384 **MAIN FIGURE TITLES AND LEGENDS:**

385 **Figure 1. Overview of the INGEst and other synchronized setups. (A)** Main  
386 components of INGEst: FED3 and a dual lick port detector. **(B)** Tools for studying neural  
387 activity and animal behavior: miniscope calcium imaging with freely moving mice, voltage  
388 pulse generator to trigger light for optogenetics, and a camera to record animal behavior.  
389 **(C)** Bpod microprocessor for integration and synchronization of INGEst, miniscope,  
390 voltage pulse generator, and camera. **(D-F)** Pictures of real setup in our lab. **(D)** Animal  
391 working area in the INGEst. **(E)** FED3 and water spout in the INGEst. **(F)** Affiliated the  
392 setups, e.g., Bpod and Pulse Pal.

393

394 **Figure 2. Free feeding and drinking behavioral patterns of food-restricted mice. (A)**  
395 Scheme of free feeding and drinking behavioral protocol under food restriction. **(B)** Free  
396 feeding and drinking behaviors across days of one food-restricted mouse. **(C)** Free  
397 feeding and drinking behaviors across days of food-restricted mice (n = 5). **(D)** Different  
398 periods (0 – 10, 10 – 20, 20 – 30 minutes) of feeding and drinking behaviors across days  
399 (mice n = 5). **(E-G)** Animal location and time in INGEst. **(E)** Scheme of the behavioral  
400 area in INGEst. **(F)** 2-D view of the animal location and time in the INGEst. **(G)** 3-D view  
401 of the animal location over time in the INGEst. **(H)** Animal locomotion in the INGEst  
402 across days. **(I)** Time in the water/food zone (mice n = 3).

403

404 **Figure 3. Reversal learning task associated with pellets and calcium imaging**  
405 **during the behavioral task. (A)** Scheme of virus injection and GRIN lens implantation in  
406 the insular cortex. **(B)** Scheme of reversal learning behavioral training protocol with food-  
407 restricted mice. **(C)** Operant nose-poke behavior associated with food pellets under food  
408 restriction. Dashed lines represent the end of a daily training session. Red lines represent  
409 nose pokes on either the left or right side. **(D)** Reversal learning behavioral training with  
410 food pellets under food restriction. Nose-poke ports switch between active and inactive  
411 after 5 active nose pokes on the same side. The training lasts for 30 minutes per day, and  
412 requires at least 8 days. The blue line indicates which nose port is active, red lines indicate  
413 active nose pokes, black lines indicate inactive nose pokes. **(E-G)** Reversal learning

414 across days. **(E)** Reversal number, Correct rate of nose pokes, Performed trial number  
415 (n=4). **(F)** Scheme of a trial, that lasts for 10 seconds after a nose poke at the active nose-  
416 poke port, in operant nose-poke training and reversal learning task. **(G)** Image of  
417 endoscope imaging view. **(H)** 5 traces of imaging coupled with animal behavior. Black  
418 lines: active nose pokes; magenta lines: licking water; Black dashed lines: inactive nose  
419 pokes; green square: right side of nose poke; cyan square: left side of nose poke. **(I-M)**  
420 Calcium imaging in the insular cortex during reversal operant behavior. Traces are aligned  
421 at time 0. **(I-J)** One example neuron that responds before pellet retrieval. **(K-L)** One  
422 example neuron that responds during pellet consumption. **(M)** The activity of all cells  
423 during specific types of trials. **(N)** Proportion of cells in response to a specific period in a  
424 trial.

425  
426 **Figure 4. Reversal learning task associated with water and calcium imaging during**  
427 **the behavioral task. (A)** Scheme of reversal learning behavioral training protocol with  
428 water-restricted mice. **(B)** Operant nose-poke behavior associated with water under water  
429 restriction. Red lines represent nose pokes on either the left or right side. **(C)** Reversal  
430 learning behavioral training with water under water restriction. Nose-poke ports switch  
431 between active and inactive after 5 active nose pokes on the same side. The training lasts  
432 for 30 minutes per day, and requires at least 8 days. The blue line indicates which nose  
433 port is active, red lines indicate active nose pokes, black lines indicate inactive nose  
434 pokes. **(D-G)** Reversal learning across days. **(D)** Reversal number, Correct rate of nose  
435 pokes, Performed trial number (n=4). **(E)** Scheme of a trial, that lasts for 10 seconds  
436 after a nose poke at the active nose-poke port, in operant nose-poke training and reversal  
437 learning task. **(F)** Image of endoscope imaging view. **(G)** 5 traces of imaging coupled with  
438 animal behavior. Black lines: active nose pokes; magenta lines: pellet retrieval; Black  
439 dashed lines: inactive nose pokes; green square: right side of nose poke; cyan square:  
440 left side of nose poke. **(H-K)** Calcium imaging in the insular cortex during reversal operant  
441 behavior. Traces are aligned at time 0. **(H-I)** One example neuron that responds to licking  
442 water. **(J-K)** One example neuron that responds during pellet consumption. **(L-M)** The  
443 activity of all cells during specific types of trials. **(N)** Proportion of cells in response to a  
444 specific period in a trial.

445  
446  
447 **Figure 5. Feeding and drinking behavioral choice and calcium imaging during the**  
448 **behavioral task. (A)** Scheme of reversal learning behavioral training protocol with water-  
449 or food-restricted mice. **(B)** Food and water choice behavior under water restriction. **(C)**  
450 Food and water choice behavior under food restriction. **(D)** Food and water choice  
451 behavior under water or food restriction across days (n=4). **(E-F)** 3 traces of imaging  
452 coupled with animal behavior from the same cells imaged on different days. Magenta  
453 lines: nose pokes; cyan lines: pellet retrieval; blue lines: licking water.  
454 **(G)** An example of a neuron that showed a peak of activity after the first lick of water and  
455 before pellet retrieval under the water restriction condition. This neuron showed a peak  
456 of activity in water choice trials before the first lick and before pellet retrieval. **(H)** An  
457 example of a neuron that showed a peak of activity after the first lick of water but not  
458 during the consumption of pellets. This neuron showed a higher response in water choice  
459 trials under the water restriction condition compared to the food restriction condition. This

460 neuron showed a higher response in food choice trials under the food restriction condition  
461 compared to the water restriction condition. **(I-L)** The activity of all cells during specific  
462 types of trials. **(M)** Proportion of cells in response to a specific period in a trial.

463  
464 **Figure 6. Feeding and drinking behavioral choice and calcium imaging of specific**  
465 **cell type in the medial prefrontal cortex during the behavioral task. (A)** Scheme of  
466 virus injection and GRIN lens implantation in the insular cortex. **(B)** Scheme of reversal  
467 learning behavioral training protocol with water- or food-restricted mice. **(C)** Food and  
468 water choice behavior under water restriction. **(D)** Food and water choice behavior under  
469 food restriction. **(E)** 3 traces of imaging coupled with animal behavior from the same cells  
470 imaged on different days. Magenta lines: nose pokes; cyan lines: pellet retrieval; blue  
471 lines: licking water. **(F-I)** An example of a neuron that showed a decrease of activity after  
472 an active nose poke under the water restriction condition **(F-G)**, but did not show a change  
473 under food restriction conditions **(H-I)**. **(J-K)** An example of a neuron that showed a peak  
474 of activity after the first lick of water and after pellet retrieval under the food restriction  
475 condition. The neural response after pellet retrieval is much stronger than the response  
476 after licking water. **(L-M)** The activity of all cells during specific types of trials under the  
477 food restriction condition. **(N)** Proportion of cells in response to a specific period in a trial.

478  
479

## 480 **RESOURCE AVAILABILITY**

### 481 **Lead Contact**

482 Further information and requests should be directed to and will be fulfilled by the Lead  
483 Contact (Sarah A. Stern; [sarah.stern@mpfi.org](mailto:sarah.stern@mpfi.org)).

### 484 **Materials Availability**

485 Materials used here are available from the Lead Contact upon reasonable request.

### 486 **Data and Code Availability**

487 Raw data and code supporting the current study are available from the Lead Contact  
488 upon reasonable request.

489  
490  
491  
492  
493  
494  
495  
496  
497  
498  
499  
500  
501  
502  
503  
504

505  
506  
507  
508  
509  
510  
511  
512  
513  
514  
515  
516  
517  
518  
519  
520  
521  
522

## EXPERIMENTAL MODEL AND SUBJECT DETAILS

### Mice

All experiments were approved by the Max Planck Florida Institute for Neuroscience Animal Care and Use Committee (Protocol #22-002) and were in accordance with the National Institute of Health Guide for the Care and Use of Laboratory Animals. Maximal efforts were made to reduce the suffering and the number of mice used. Male and female ObRb-Cre (Jackson Laboratory, 008320) and Htr3a-Cre: Ai14 (MGI:5435492, and Jackson Laboratory, 007914) mice are 12–20 weeks old at the beginning of behavioral experiments. Animals (ObRb-Cre) for free feeding and drinking behaviors were kept in individual cages under standard conditions in a day/night cycle of 12/12 hours (lights on at 7 am). For the reversal learning and choice behavior, mice (ObRb-Cre and Htr3a-Cre) were kept in individual cages in a reversed light-dark cycle.

### Materials and methods

#### Behavioral setup

| Item                        | Quantity | Catalog number | Company         | Schematic Name           | Price (\$) |
|-----------------------------|----------|----------------|-----------------|--------------------------|------------|
| <b>Microcontroller</b>      |          |                |                 |                          |            |
| Bpod State Machine r1       | 1        | 1027           | Sanworks        | Bpod                     | 925        |
| Bpod State Machine r2       | 1        | 1024           | Sanworks        | Bpod                     | 945        |
| Analog input module 8ch     | 1        | 1021           | Sanworks        | Analog input module 8ch  | 495        |
| Analog output module 4ch    | 1        | 1013           | Sanworks        | Analog output module 4ch | 495        |
| Bpod Valve Driver Module    | 1        | 1015           | Sanworks        | Bpod Valve Driver Module | 285        |
| <b>Lickometer</b>           |          |                |                 |                          |            |
| Dual Lick Port Detector     | 1        | 2021-022       | Janelia         | Lick port detector       | 80         |
| RJ45 Breakout Board         | 2        | ET-CON RJ45    | ETT             | RJ45-TERM                | 16         |
| Solenoid valve              | 2        | LHDA 12332 15H | The Lee Company | Water valve              | 50*2=100   |
| Tubing ID 1/16"             | 1        | 57217          | Tygon           | tubing                   | 12.5       |
| Tubing ID 1/32"             | 1        | 54623          | Tygon           | tubing                   | 17.5       |
| Hypodermic tubing           | 1        | 316H18TW       | Microgroup      | Metal lick port          | 45         |
| <b>Feeding detection</b>    |          |                |                 |                          |            |
| Fed3                        | 1        | Fed3.1         | Open Ephys      | Fed3                     | 205        |
| <b>Computer and monitor</b> |          |                |                 |                          |            |

|                      |   |                |          |                 |                 |
|----------------------|---|----------------|----------|-----------------|-----------------|
| Computer             | 1 | Precision 3650 | Dell     | Computer        | 1109            |
| Monitor              | 2 | Dell S2421     | Dell     | Monitor         | 150*2=300       |
| Monitor mounting kit | 1 | Ergotron kit   | Dell     | Mounting kit    | 134             |
| Camera               | 2 |                | ELP      | Camera          | 60 * 2 = 120    |
| <b>Optogenetics</b>  |   |                |          |                 |                 |
| LED                  | 2 | M470F3         | Thorlabs | LED             | 419.27*2=838.54 |
| LED driver           | 2 | LEDD1B         | Thorlabs | LED driver      | 331.64*2=663.28 |
| Power supplier       | 2 | KPS201         | Thorlabs | Power supplier  | 37.66*2=75.32   |
| Pulse Pal V2         | 1 | 1102           | Sanworks | Pulse generator | 995             |
| <b>In total:</b>     |   |                |          |                 |                 |
|                      |   |                |          |                 | 7856.14\$       |

523

### 524 **Surgery and viral administration**

525 Mice were anesthetized by isoflurane (3% for the induction and 1.5% during the  
 526 surgery) and placed on a stereotaxic apparatus (Model 900, KOPF instruments, CA,  
 527 USA) with a mouse adaptor and lateral ear bars. For viral vector delivery, AAV vectors  
 528 were loaded in a glass pipette and infused by a nanoliter injector (DRUMMOND,  
 529 nanoinject II). The injection coordinates in anteroposterior (AP) / mediolateral (ML) /  
 530 dorsoventral (DV) from Bregma, were in mm: for the insular cortex, +0.5/±3.85/-3.9 (250  
 531 nL, 100 nL/min), for the ProView Integrated GRIN lens implantation +0.5/±3.85/-3.9  
 532 (0.5mm X 6.1mm, 1050-004415). The virus is pGP-AAV-syn-jGCaMP8m-WPRE  
 533 (Addgene 162375, 1.7x10<sup>13</sup> GC/mL). The coordinates used were decided according to  
 534 the mouse brain atlas (Paxinos and Franklin, 2001).

535

### 536 **Behavioral training**

537 1) Food restriction: Adult mice over 20 grams receive 70% (~2g) of standard 5V5R chow  
 538 food on the floor in home cages for around a week and body weight reaches to 85-90%  
 539 of body weight before animal training.

540 2) Free feeding and drinking behaviors: free food and water in the behavioral chamber  
 541 for 3-5 sessions (one session per day, each session lasts 30 minutes); recording calcium  
 542 signal during the behavior. Mice will be provided extra chow to reach to 70% (~2g) of daily  
 543 food if mice eat food pellets (Dustless Precision Pellets® Rodent, Grain-Base #F163)  
 544 from FED3 feeder less than 70% of daily food during the behavioral task.

545 3) Nose poke feeding training and reversal learning: Nose poke is required to get available  
 546 food. After a left/right nose poke followed by an auditory cue, a pellet will be delivered to  
 547 the pellet well. The response period is 10 seconds. Active nose poke port switches from  
 548 one side to another side every 5 trials. Active water spout is on the same side as the  
 549 active nose poke port. Mice can only have available pellets during the behavior. Mice will  
 550 be provided extra chow to reach 70% (~2g) of daily food if mice eat less than 70% of daily  
 551 food during the behavioral task. This training phase will last for 8-10 sessions.

552 4) Water restriction: Mice receive 0.8 mL water per day and food ad libitum for 7 days  
553 before starting animal training.

554 5) Nose poke drinking training and reversal learning: Nose poke is required to get  
555 available water. After a left/right nose poke followed by an auditory cue, 5 $\mu$ l water is  
556 available after licking the water spout. The response period is 10 seconds. Active nose  
557 poke port switches from one side to another side every 5 trials. Active water spout is on  
558 the same side as the active nose poke port. Mice can only have available pellets during  
559 the behavior. Mice will be provided extra water to reach 0.8 ml if mice drink less water  
560 than 0.8 ml during the behavioral task. This training phase will last for 8-10 sessions.

561 6) Nose poke training and reversal learning: Nose poke is required to get available food  
562 and water. After a left/right nose poke followed by an auditory cue, a pellet will be  
563 delivered to the pellet well and 5 $\mu$ l water is available after licking the water spout. The  
564 response period is 10 seconds. Active nose poke port switches from one side to another  
565 side every 5 trials. Active water spout is on the same side as the active nose poke port.  
566 Mice can only have available pellets during the behavior. Mice will be provided extra chow  
567 to reach to 70% (~2g) of daily food if mice eat less than 70% of daily food during the  
568 behavioral task. This training phase will last for 8-10 sessions.

569 6) Food/water choice task: After a nose poke followed by an auditory cue, mice could  
570 either get a pellet from pellet well or get 5 $\mu$ l water by licking the active water spout. If mice  
571 get pellet first, water will not be available. But if mice lick water first, pellet is still available.  
572 This training phase will last for 3~7 sessions under water restriction conditions, then do  
573 the same behavior under food restriction conditions.

574

## 575 **DATA ANALYSIS**

576 Behavioral data was collected by MATLAB. Imaging data was collected by Inscopix  
577 DAQ box and preprocessed by Inscopix IDPS software to obtain  $\Delta F/F$  values. Data  
578 analysis was done by MATLAB.

579

## 580 **ACKNOWLEDGEMENTS**

581 We thank the Max Florida Institute ARC, and in particular Colleen Neiner, for animal  
582 care. We thank Dr. Carmen Varela and Joseph Wasserman for the discussion of the  
583 behavioral task. We also thank Darielle Lewis-Sanders and Elisa Mizrachi for their help  
584 in administration. We are grateful to Yingxue Wang and Freda Pang for their help in  
585 making and using dual lick port detector. We thank Dr. Hidehiko Inagaki and Shouvik  
586 Majumder for their assistance in Matlab programming training. This work was supported  
587 by the National Institutes of Health Brain Initiative R00DA04749 (S.A.S) and National  
588 Institutes of Health DP2DA060436 (S.A.S) the Brain Research Foundation Seed Grant  
589 (S.A.S), the One Mind Foundation Rising Star Award (S.A.S.), the Max Planck Florida  
590 Institute for Neuroscience, and the Max Planck Society.

591

## 592 **AUTHOR CONTRIBUTIONS**

593 Z.Z. conceived the project, performed the behavioral and imaging experiments,  
594 analyzed behavioral and imaging data, and wrote the original draft. B.X. and Z.Z. wrote  
595 codes for data analysis. B.X. analyzed animal video. C.L., S.A., I.M., and A.S. assisted  
596 in behavioral experiments. M.B. contributed project supervision regarding Htr3a mice.

597 S.A.S contributed funding acquisition, project supervision, and writing the manuscript.  
598 All authors read and approved the manuscript.

599

## 600 **DECLARATION OF INTERESTS**

601 The authors declare no competing interests.

602

## 603 **REFERENCES**

604 Allen, W.E., DeNardo, L.A., Chen, M.Z., Liu, C.D., Loh, K.M., Fenno, L.E.,  
605 Ramakrishnan, C., Deisseroth, K., and Luo, L. (2017). Thirst-associated preoptic  
606 neurons encode an aversive motivational drive. *Science* 357, 1149-1155.  
607 [10.1126/science.aan6747](https://doi.org/10.1126/science.aan6747).

608

609 Betley, J.N., Xu, S., Cao, Z.F.H., Gong, R., Magnus, C.J., Yu, Y., and Sternson, S.M.  
610 (2015). Neurons for hunger and thirst transmit a negative-valence teaching signal.  
611 *Nature* 521, 180-185. [10.1038/nature14416](https://doi.org/10.1038/nature14416).

612

613 Craig, A.D. (2003). Interoception: the sense of the physiological condition of the body.  
614 *Curr Opin Neurobiol* 13, 500-505. [10.1016/s0959-4388\(03\)00090-4](https://doi.org/10.1016/s0959-4388(03)00090-4).

615

616 Deng, H., Xiao, X., Yang, T., Ritola, K., Hantman, A., Li, Y., Huang, Z.J., and Li, B.  
617 (2021). A genetically defined insula-brainstem circuit selectively controls motivational  
618 vigor. *Cell* 184, 6344-6360 e6318. [10.1016/j.cell.2021.11.019](https://doi.org/10.1016/j.cell.2021.11.019).

619

620 Eiselt, A.K., Chen, S., Chen, J., Arnold, J., Kim, T., Pachitariu, M., and Sternson, S.M.  
621 (2021). Hunger or thirst state uncertainty is resolved by outcome evaluation in medial  
622 prefrontal cortex to guide decision-making. *Nat Neurosci* 24, 907-912. [10.1038/s41593-021-00850-4](https://doi.org/10.1038/s41593-021-00850-4).

623

624  
625 Gizowski, C., and Bourque, C.W. (2018). The neural basis of homeostatic and  
626 anticipatory thirst. *Nat Rev Nephrol* 14, 11-25. [10.1038/nrneph.2017.149](https://doi.org/10.1038/nrneph.2017.149).

627

628 Leib, D.E., Zimmerman, C.A., and Knight, Z.A. (2016). Thirst. *Curr Biol* 26, R1260-  
629 R1265. [10.1016/j.cub.2016.11.019](https://doi.org/10.1016/j.cub.2016.11.019).

630

631 Livneh, Y., and Andermann, M.L. (2021). Cellular activity in insular cortex across  
632 seconds to hours: Sensations and predictions of bodily states. *Neuron* 109, 3576-3593.  
633 [10.1016/j.neuron.2021.08.036](https://doi.org/10.1016/j.neuron.2021.08.036).

634

635 Livneh, Y., Ramesh, R.N., Burgess, C.R., Levandowski, K.M., Madara, J.C., Fenselau,  
636 H., Goldey, G.J., Diaz, V.E., Jikomes, N., Resch, J.M., et al. (2017). Homeostatic circuits  
637 selectively gate food cue responses in insular cortex. *Nature* 546, 611-616.  
638 [10.1038/nature22375](https://doi.org/10.1038/nature22375).

639

640 Livneh, Y., Sugden, A.U., Madara, J.C., Essner, R.A., Flores, V.I., Sugden, L.A., Resch,  
641 J.M., Lowell, B.B., and Andermann, M.L. (2020). Estimation of Current and Future

642 Physiological States in Insular Cortex. *Neuron* 105, 1094-1111 e1010.  
643 10.1016/j.neuron.2019.12.027.  
644  
645 Matikainen-Ankney, B.A., Earnest, T., Ali, M., Casey, E., Wang, J.G., Sutton, A.K.,  
646 Legaria, A.A., Barclay, K.M., Murdaugh, L.B., Norris, M.R., et al. (2021). An open-source  
647 device for measuring food intake and operant behavior in rodent home-cages. *Elife* 10.  
648 10.7554/eLife.66173.  
649  
650 Paxinos, G., and Franklin, B.J.K. (2001). *The Mouse Brain in Stereotaxic Coordinates*,  
651 Second Edition (Academic Press).  
652  
653 Richman, E.B., Ticea, N., Allen, W.E., Deisseroth, K., and Luo, L. (2023). Neural  
654 landscape diffusion resolves conflicts between needs across time. *Nature* 623, 571-579.  
655 10.1038/s41586-023-06715-z.  
656  
657 Rowland, N.E. (2004). The vagus nerve and thirst. *Physiol Behav* 82, 75-80.  
658 10.1016/j.physbeh.2004.04.039.  
659  
660 Stern, S.A., Azevedo, E.P., Pomeranz, L.E., Doerig, K.R., Ivan, V.J., and Friedman, J.M.  
661 (2021). Top-down control of conditioned overconsumption is mediated by insular cortex  
662 *Nos1* neurons. *Cell Metab* 33, 1418-1432 e1416. 10.1016/j.cmet.2021.03.001.  
663  
664 Stern, S.A., Doerig, K.R., Azevedo, E.P., Stoffel, E., and Friedman, J.M. (2020). Control  
665 of non-homeostatic feeding in sated mice using associative learning of contextual food  
666 cues. *Mol Psychiatry* 25, 666-679. 10.1038/s41380-018-0072-y.  
667  
668 Watts, A.G., Kanoski, S.E., Sanchez-Watts, G., and Langhans, W. (2022). The  
669 physiological control of eating: signals, neurons, and networks. *Physiol Rev* 102, 689-  
670 813. 10.1152/physrev.00028.2020.  
671  
672 Zhao, Z., Covelo, A., Mitra, A., Varilh, M., Wu, Y., Jacky, D., Cannich, A., Bellocchio, L.,  
673 Marsicano, G., and Beyeler, A. (2022). Cannabinoids regulate an insula circuit  
674 controlling water intake. *bioRxiv*. <https://doi.org/10.1101/2022.03.18.484736>.  
675  
676 Zhao, Z., Soria-Gomez, E., Varilh, M., Covelo, A., Julio-Kalajzic, F., Cannich, A.,  
677 Castiglione, A., Vanhoutte, L., Duveau, A., Zizzari, P., et al. (2020). A Novel Cortical  
678 Mechanism for Top-Down Control of Water Intake. *Curr Biol* 30, 4789-4798 e4784.  
679 10.1016/j.cub.2020.09.011.



Figure 1

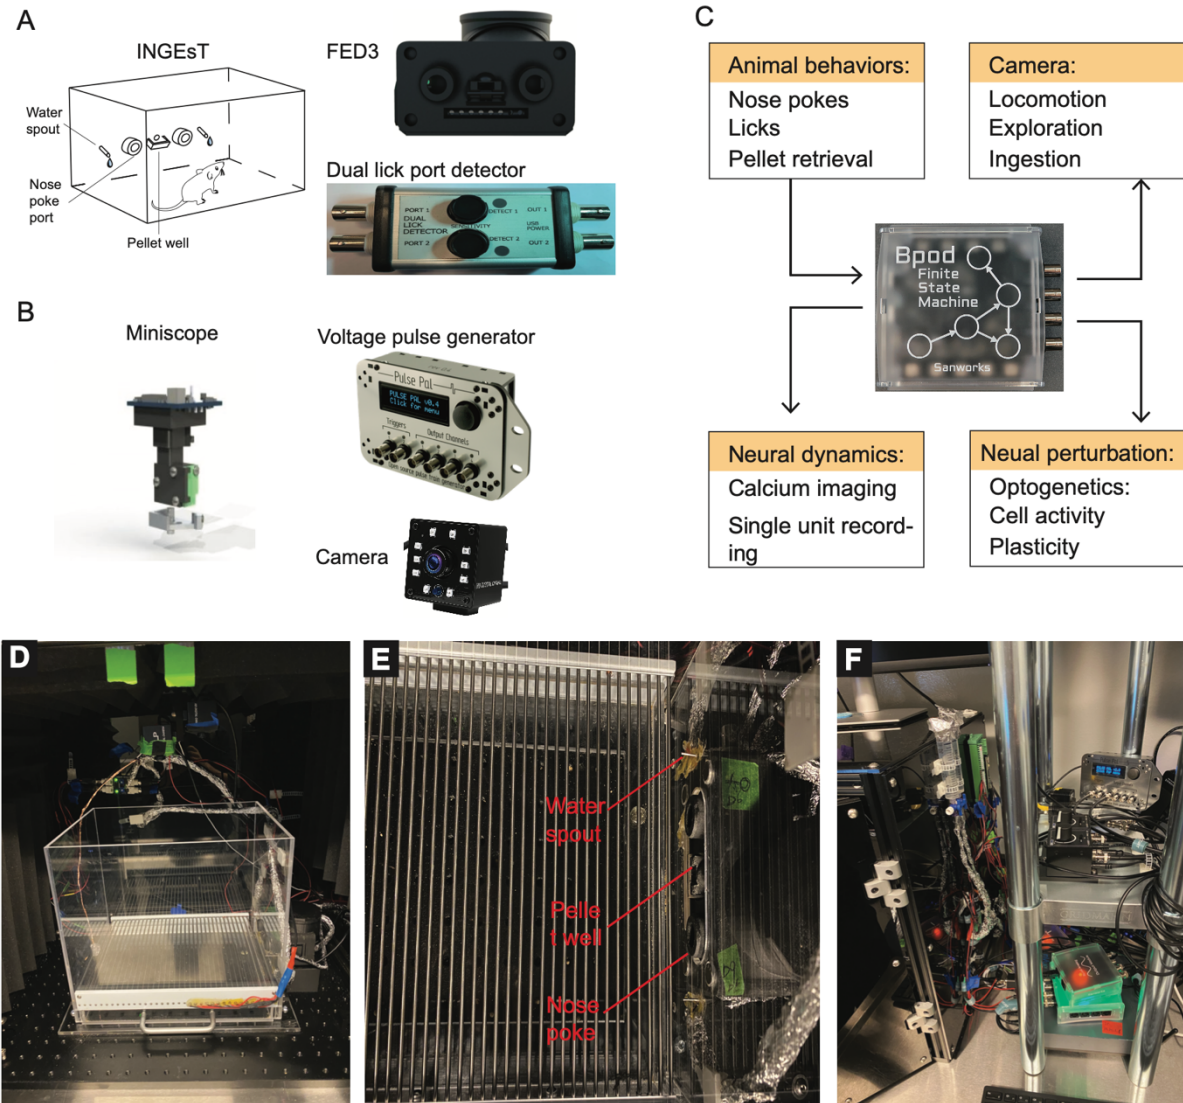

Figure 2

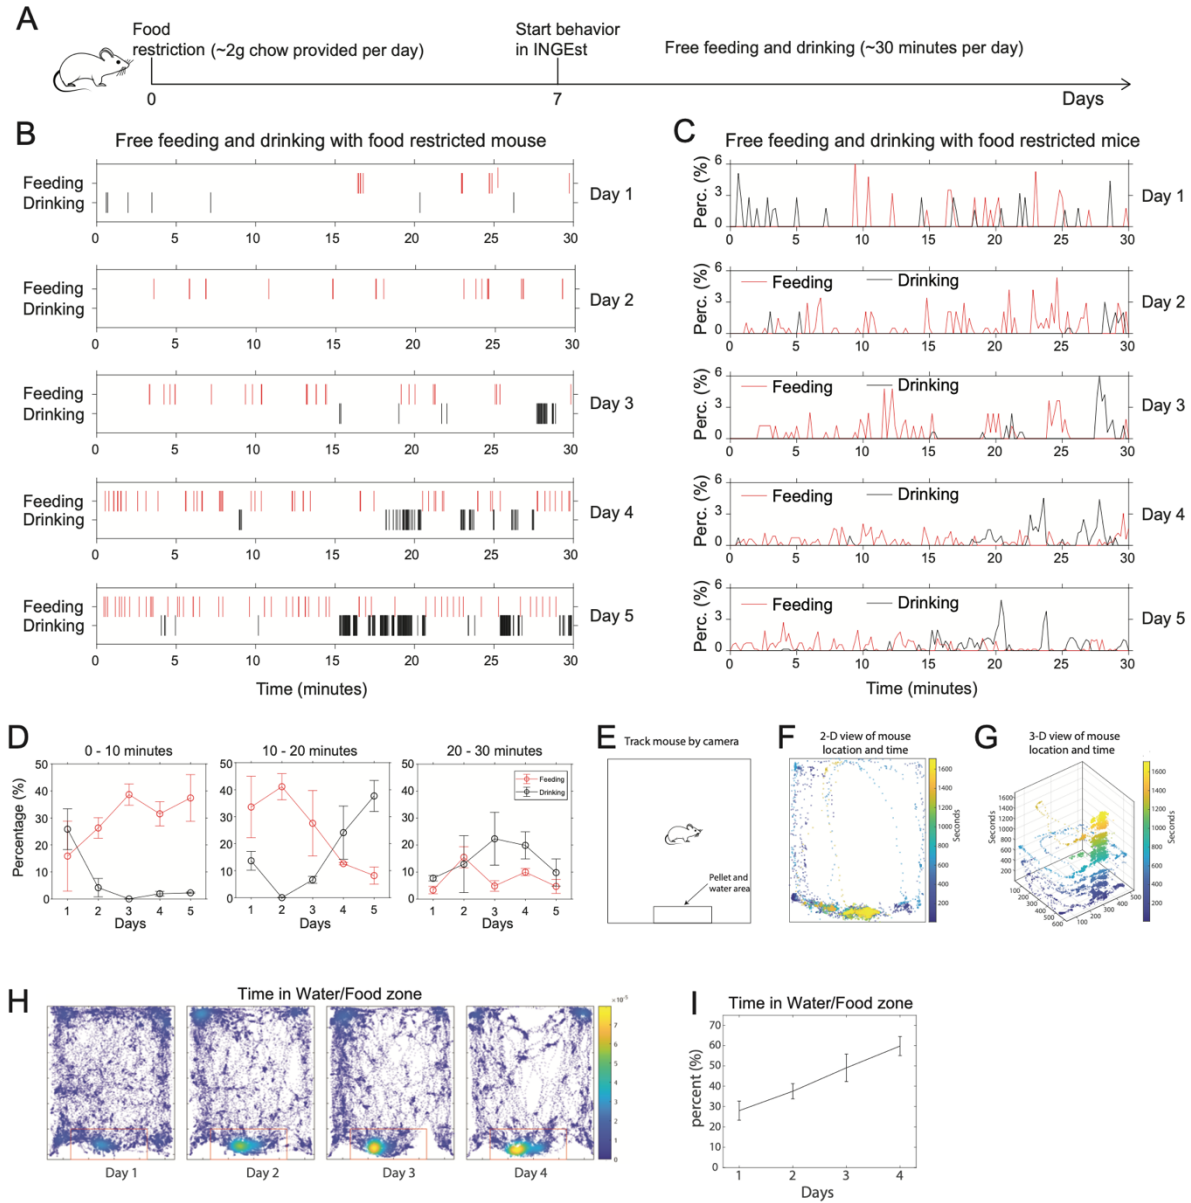

Figure 3

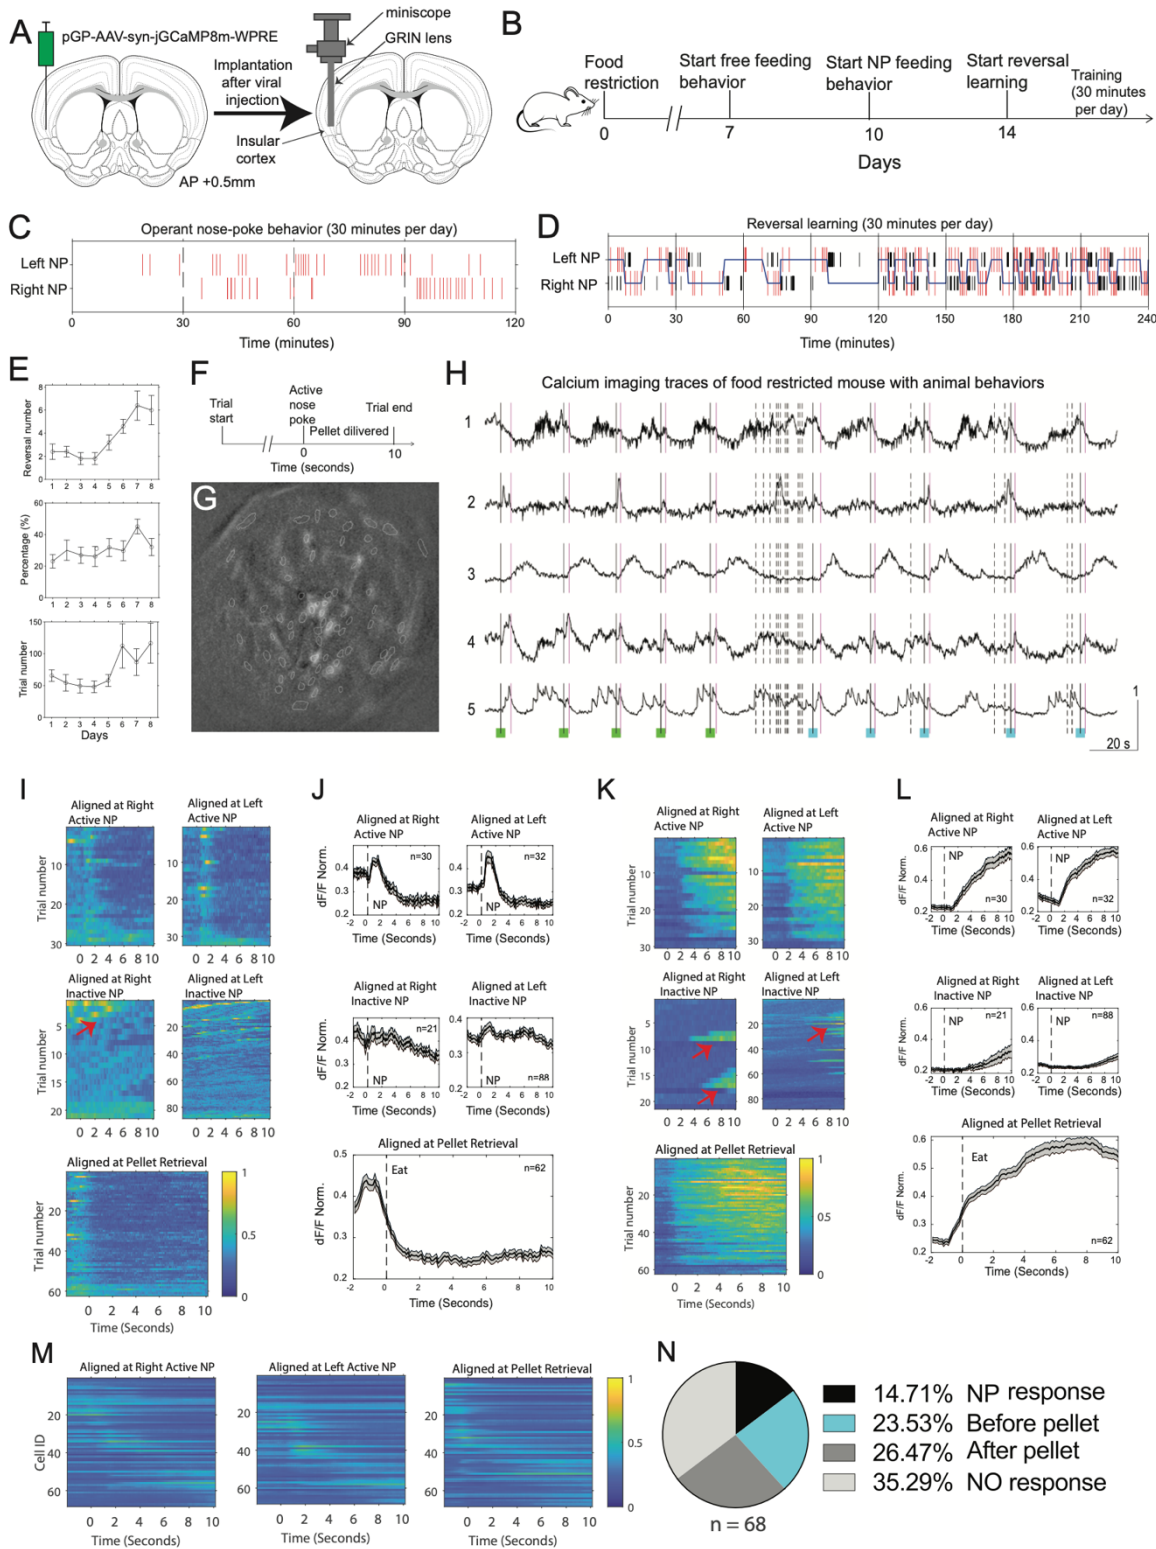

Figure 4

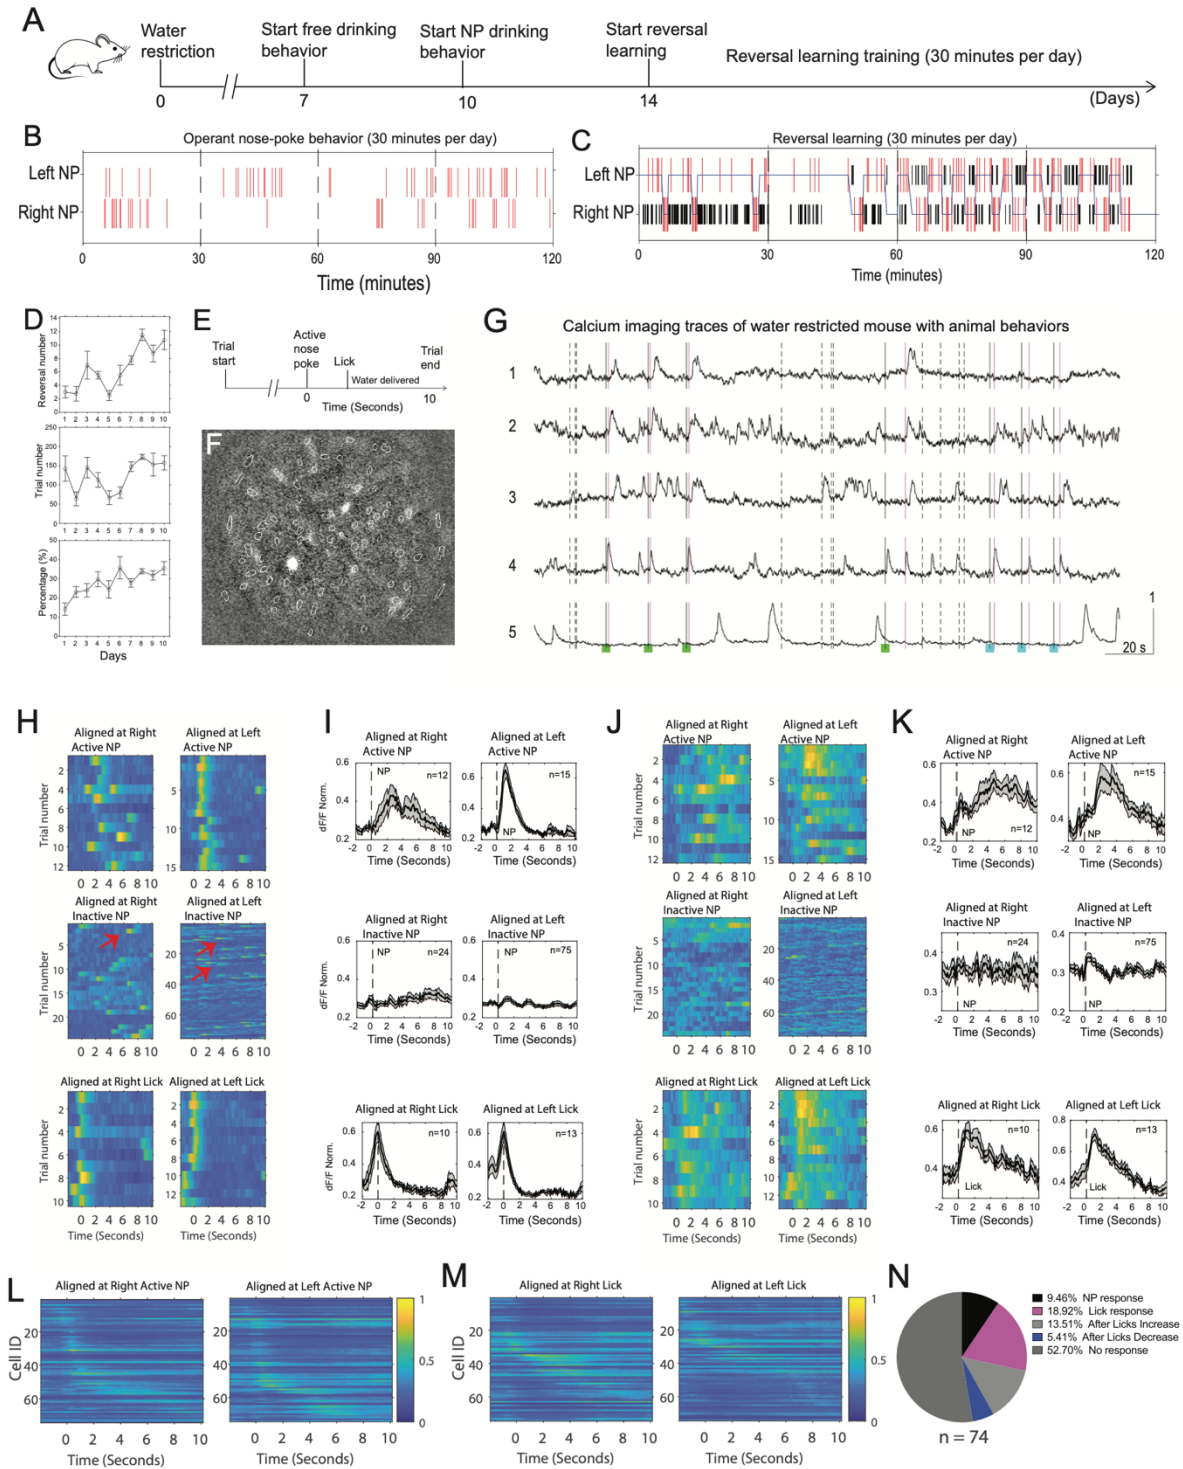

Figure 5

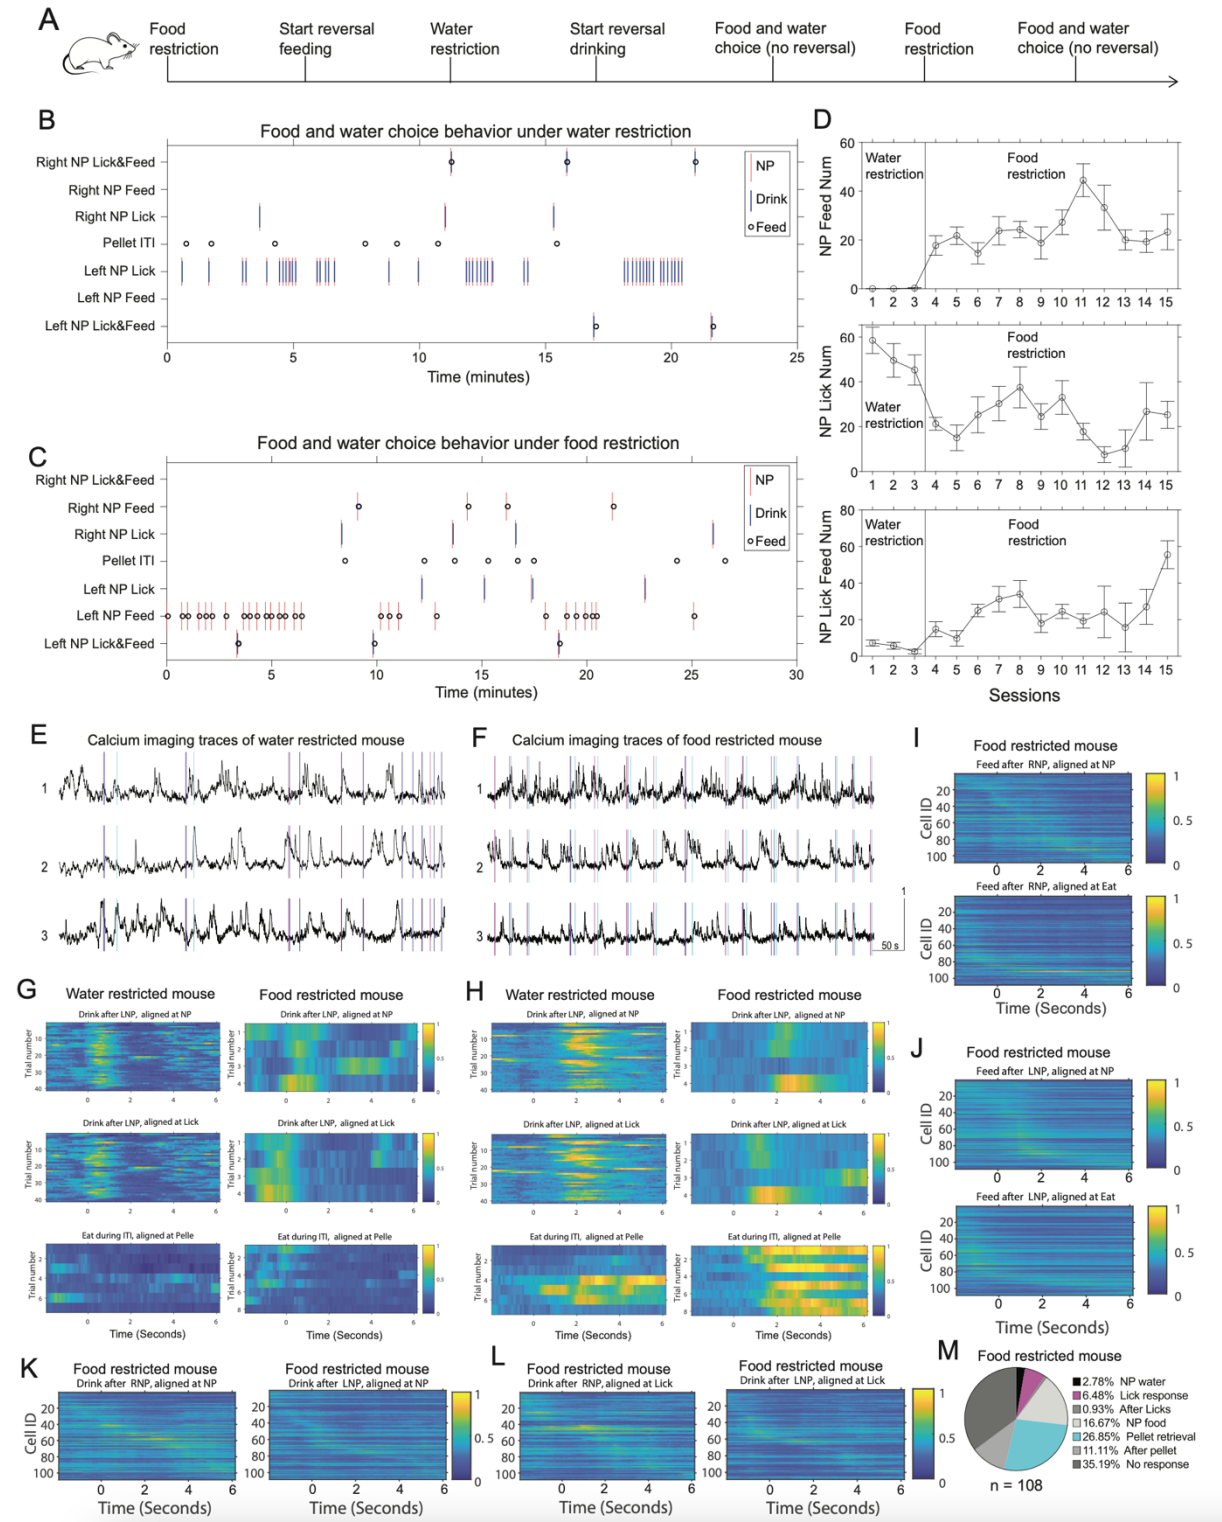

Figure 6

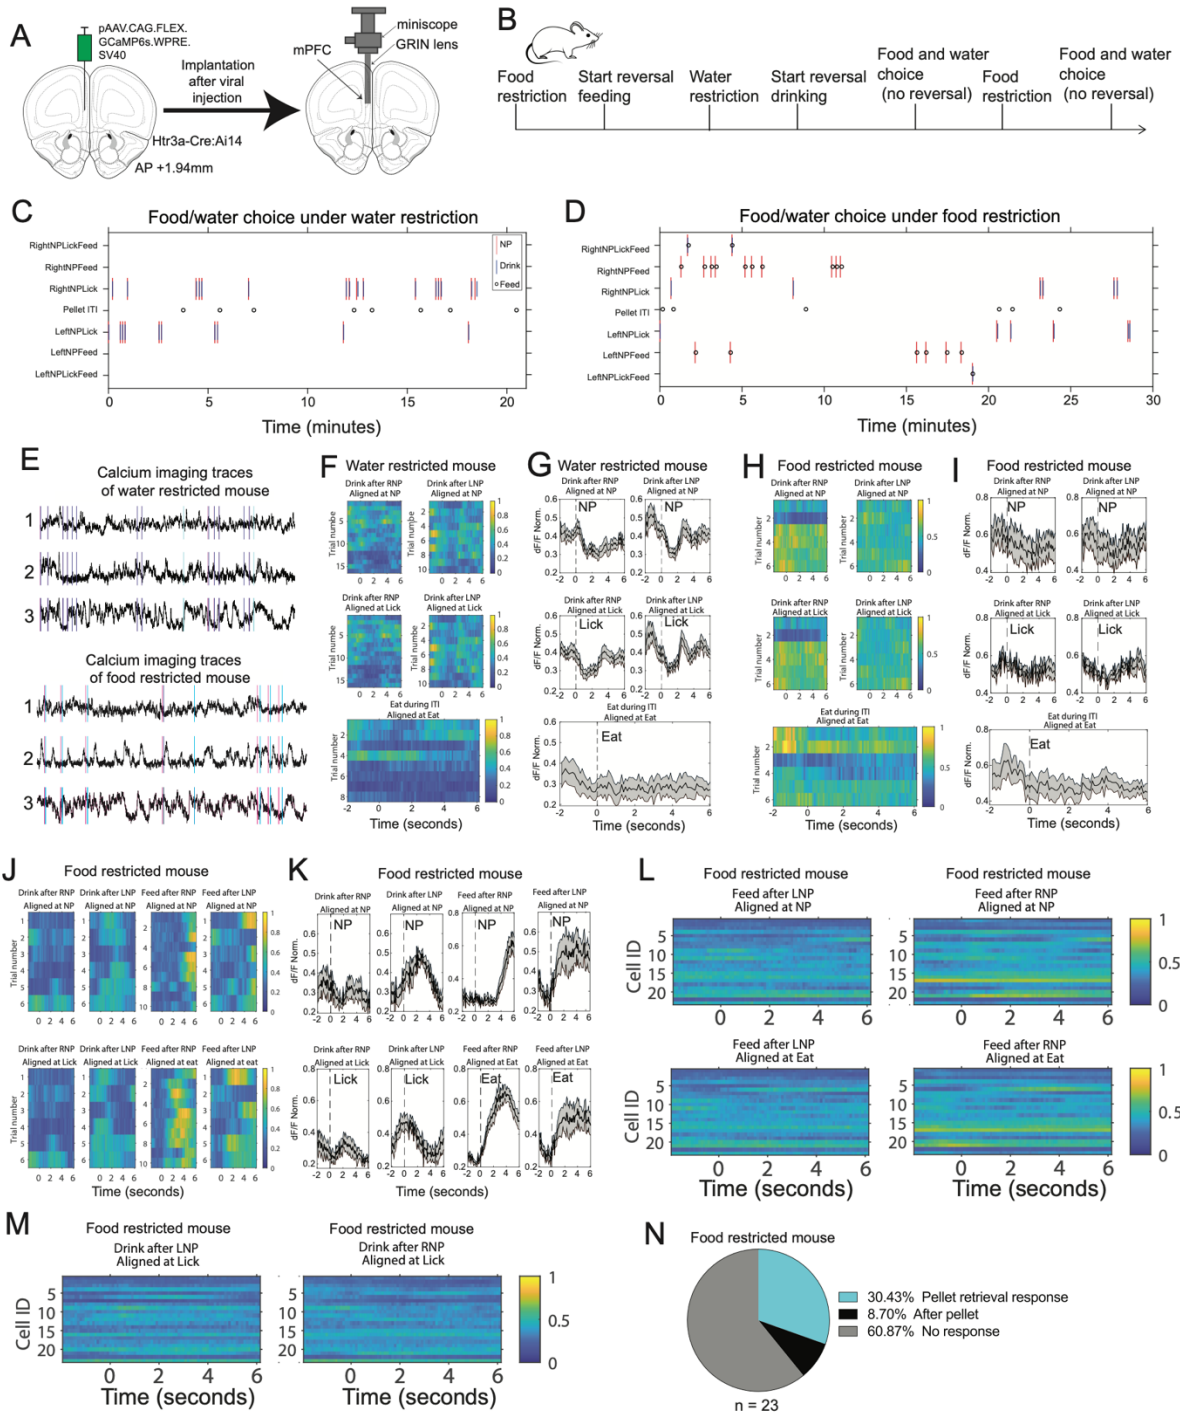

Source: https://www.biorxiv.org/content/biorxiv/early/2024/03/12/2024.03.10.584229.full.pdf
